# Supplementary material
Source: Springer Nature journal article supplement (https://www.springermedizin.de/resource/supplementary/12974_2013_935_MOESM1_ESM.pdf/9600448)

**A**

Treatment with anti-Ly-6G mAb (ip)

Experimental days

-4

-3

-2

-1

0

+1

+2

+14

CpG ODN  
Buffer

*E. coli* K1  
intracerebrally

Bacteriological  
studies

Survival  
studies

**B**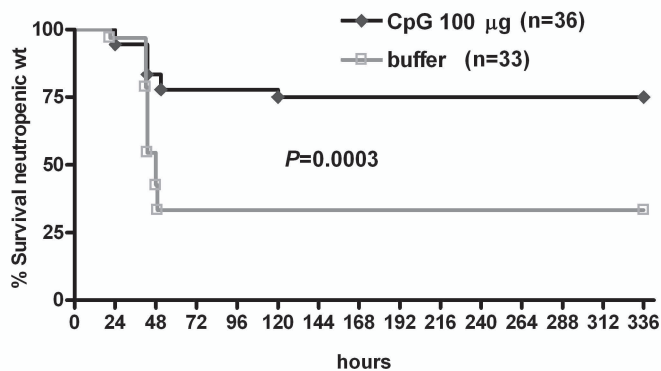**C**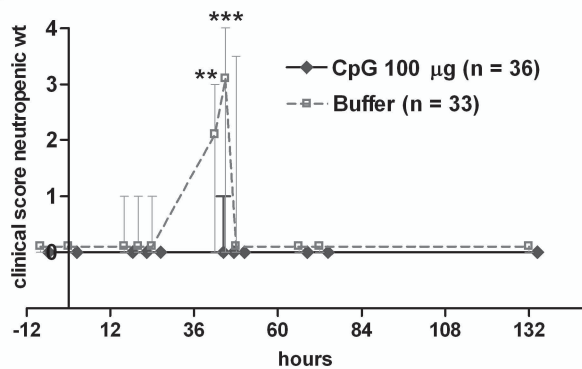**D**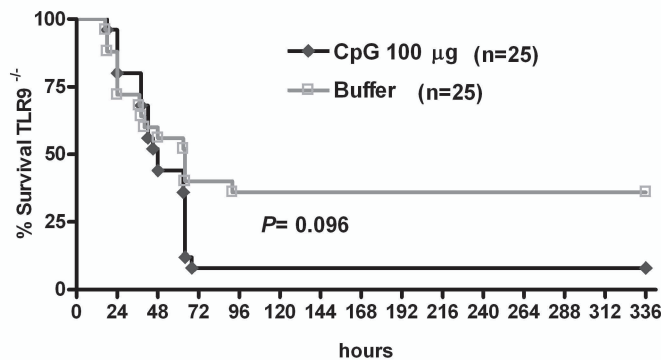**E**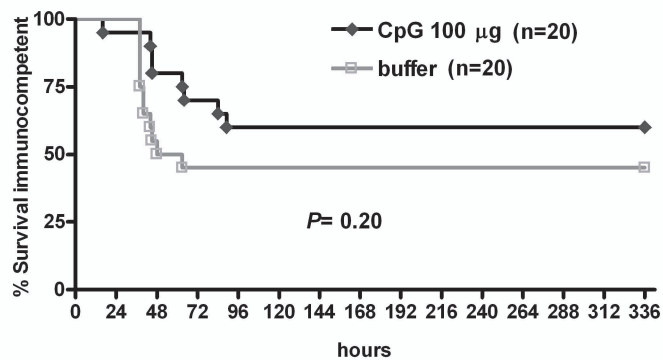

Supplement: MOESM1 [file 9600448]
